# Supplementary material for: Improved Viability of Spray-Dried Pantoea agglomerans for Phage-Carrier Mediated Control of Fire Blight
Source: MDPI journal article supplement (doi:10.3390/v16020257), 2024-02-06
Supplement: s1 [file s1]

## Supplemental Data

### A.1 Polymer Selection for the Phage-Carrier Formulation

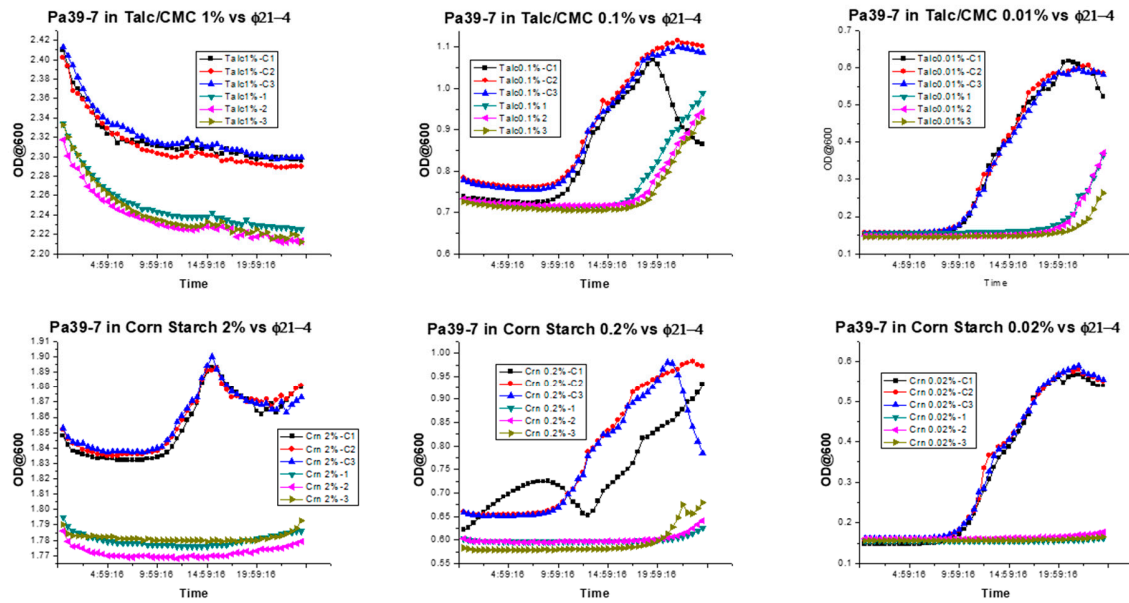

**Figure S1.** Determination of  $\phi$ Ea21-4 phage infection of *P. agglomerans* strain Pa39-7 cells in the presence of different formulation chemicals. Survival of *P. agglomerans* Pa39-7 strain after phage  $\phi$ Ea21-4 infection in the presence of Talc/CMC (Upper) and corn starch (Bottom). Assays were carried out in triplicate and the data averages and standard deviation were plotted.

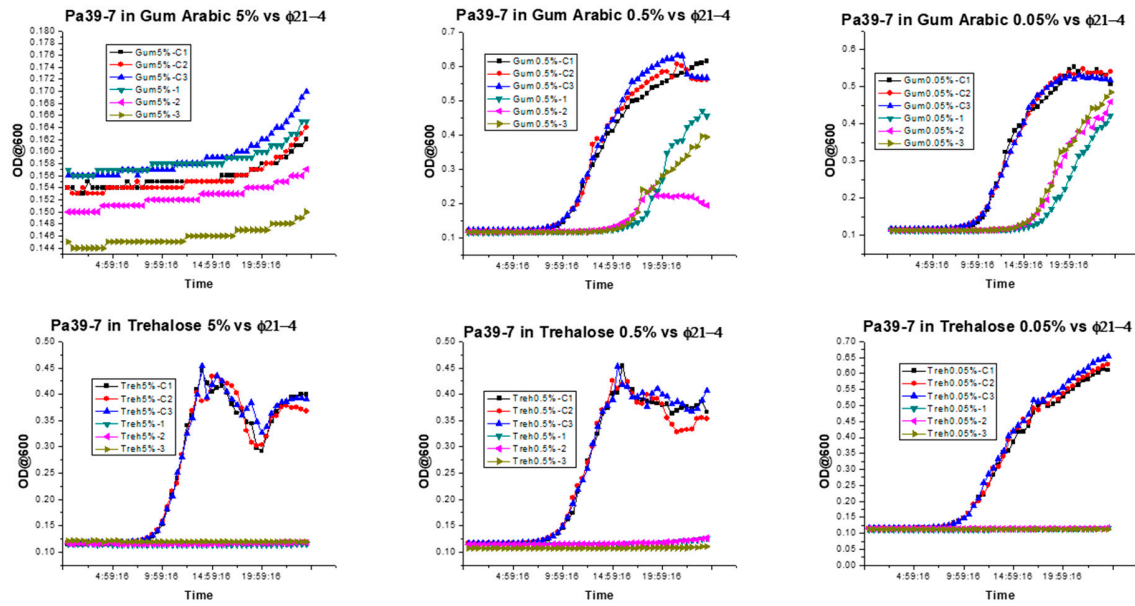

**Figure S2.** Determination of  $\phi$ Ea21-4 phage infection of *P. agglomerans* strain Pa39-7 cells in the presence of different formulation chemicals. Survival of *P. agglomerans* Pa39-7 strain after phage  $\phi$ Ea21-4 infection in the presence of gum arabic (Upper) and D(+)-trehalose (Bottom). Assays were carried out in triplicate and the data averages and standard deviation were plotted.

## A.2 Formulation Optimization

**Table S1:** Trails for optimizing the formula to overcome nozzle blockage of the PCA.

| Trials                                                                              | Trehalose (%) | Maltodextrin (%) | Talc (%) | CMC (%) | Powder Recovery (%) | Notes                                    | Bacterial log reduction after SD (CFU/mL) |
|-------------------------------------------------------------------------------------|---------------|------------------|----------|---------|---------------------|------------------------------------------|-------------------------------------------|
| No bacterial cells were added to the formula                                        |               |                  |          |         |                     |                                          |                                           |
| Trail 1                                                                             | 15            | 12.5             | 2        | 0.4     | 21.4                |                                          | NA*                                       |
| Trail 2                                                                             | 13            | 5.58             | 0        | 0.87    | 22.3                |                                          | NA                                        |
| Trail 3                                                                             | 15            | 12.5             | 0        | 0.4     | 24.8                |                                          | NA                                        |
| Trail 4                                                                             | 15            | 15               | 0        | 0.4     | 24.2                |                                          | NA                                        |
| Trail 5                                                                             | 15            | 15               | 0        | 0.4     | 27.6                |                                          | NA                                        |
| Trail 6                                                                             | 15            | 15               | 0        | 0.4     | 27.6                |                                          | NA                                        |
| Trail 7                                                                             | 15            | 18               | 0        | 0.4     | 26.9                |                                          | NA                                        |
| <i>Pantoea</i> cells (infected and not infected by phage) were added to the formula |               |                  |          |         |                     |                                          |                                           |
| Trail 8                                                                             | 15            | 15               | 0        | 0.4     | 20.1                |                                          | 0.65                                      |
| Trail 9                                                                             | 15            | 15               | 0        | 1       | NA                  | Formulation too thick                    | 1.15                                      |
| Trail 10                                                                            | 15            | 15               | 0        | 0.8     | NA                  | Formulation too thick                    | 0.27                                      |
| Trail 11                                                                            | 15            | 15               | 0        | 0.6     | 25.5                | Powder is a little bit sticky.           | ND**                                      |
| Trail 12                                                                            | 15            | 15               | 0        | 0.4     | 2.8                 | The powder was sticky.                   | ND                                        |
| Trail 13                                                                            | 15            | 15               | 0        | 0       | 26.8                | Bacteria added to formulation            | 0.83                                      |
| Trail 14                                                                            | 15            | 15               | 0        | 0       | 26.1                | Bacteria added to formulation            | 0.54                                      |
| Trail 15                                                                            | 15            | 15               | 0        | 0       | 24.1                | Bacteria added to formulation            | 0.51                                      |
| Trail 16                                                                            | 15            | 15               | 0        | 0       | 24.7                | Bacteria and phages added to formulation | 0.28                                      |
| Trail 18                                                                            | 15            | 15               | 0        | 0       | 23.6                | Bacteria and phages added to formulation | 1.35                                      |
| Trail 19                                                                            | 15            | 15               | 0        | 0       | 26.3                | Bacteria and phages added to formulation | 0.65                                      |

\*NA: Not applicable; \*\*ND : Not determined

**Table S2: Spray Drying Results for *P. agglomerans* Strain Pa39-7 Infected with  $\phi$ Ea46-1-A1**

| <b>Pa39-7 infected with <math>\phi</math>Ea46-1-A1*</b> | <b>Log CFU/mL</b> |
|---------------------------------------------------------|-------------------|
| Before Spray drying                                     | 7.7               |
| After Spray drying                                      | 6.6               |
| Viability Reduction                                     | 1.1               |

\* The survival viability after spray drying is similar to that with Pa39-7 infected with  $\phi$ Ea21-4 phage (~ 1.0 log reduction). The survival viability is 87%.

**Table S3: Spray Drying Results for *P. agglomerans* Strain Pa31-4\***

| <b>Treatment</b> | <b>Before SD (CFU/mL)</b> | <b>After SD (CFU/mL)</b> | <b>Log reduction</b> |
|------------------|---------------------------|--------------------------|----------------------|
| Pa 31-4          | $1.85 \times 10^9$        | $5.25 \times 10^8$       | 0.55                 |

\* The survival viability after spray drying is similar to that with Pa39-7 (0.5-0.7 log reduction). The survival viability is 90%.

**Table S4: Phage Propagation After Reconstitution of the PCS Powder of *P. agglomerans* strain Pa39-7 Infected with  $\phi$ Ea21-4\***

| Time (Hrs)      | Formulated** |               | Spray Dried** |               |
|-----------------|--------------|---------------|---------------|---------------|
|                 | Pa39-7       | $\phi$ Ea21-4 | Pa39-7        | $\phi$ Ea21-4 |
| T <sub>0</sub>  | 8.8          | 5.7           | 8.7           | 7.1           |
| T <sub>2</sub>  | 9.0          | 8.8           | 8.9           | 7.7           |
| T <sub>4</sub>  | 8.7          | 9.7           | 8.8           | 8.8           |
| T <sub>6</sub>  | 9.3          | 10.0          | 9.0           | 9.2           |
| T <sub>24</sub> | 9.6          | 10.0          | 9.6           | 9.4           |

\* Inoculation of 10 mL NB with reconstituted powder of Pa39-7 infected with  $\phi$ Ea21-4.

\*\*Log Starting Quantity

**Table S5: Phage propagation After Reconstitution of PCS Powder of *P. agglomerans* strain Pa39-7 Infected with  $\phi$ Ea46-1-A1\***

| Time (Hrs)      | Formulated** |                  | Spray Dried** |                  |
|-----------------|--------------|------------------|---------------|------------------|
|                 | Pa39-7       | $\phi$ Ea46-1-A1 | Pa39-7        | $\phi$ Ea46-1-A1 |
| T <sub>0</sub>  | 9.0          | 6.2              | 8.7           | 5.7              |
| T <sub>2</sub>  | 9.1          | 8.2              | 8.8           | 5.9              |
| T <sub>4</sub>  | 9.2          | 9.6              | 8.8           | 5.7              |
| T <sub>6</sub>  | 9.6          | 9.8              | 9.0           | 7.0              |
| T <sub>24</sub> | 9.5          | 9.5              | 9.4           | 9.6              |

\* Inoculation of 10 mL NB with reconstituted powder of Pa39-7 infected with  $\phi$ Ea46-A1.

\*\*Log Starting Quantity
